# Supplementary material for: Rapid Bioassay-Guided Isolation of Antibacterial Clerodane Type Diterpenoid from Dodonaea viscosa (L.) Jaeq
Source: MDPI journal article supplement (doi:10.3390/ijms160920290), 2015-08-27
Supplement: s1 [file s1]

## Supplementary Information

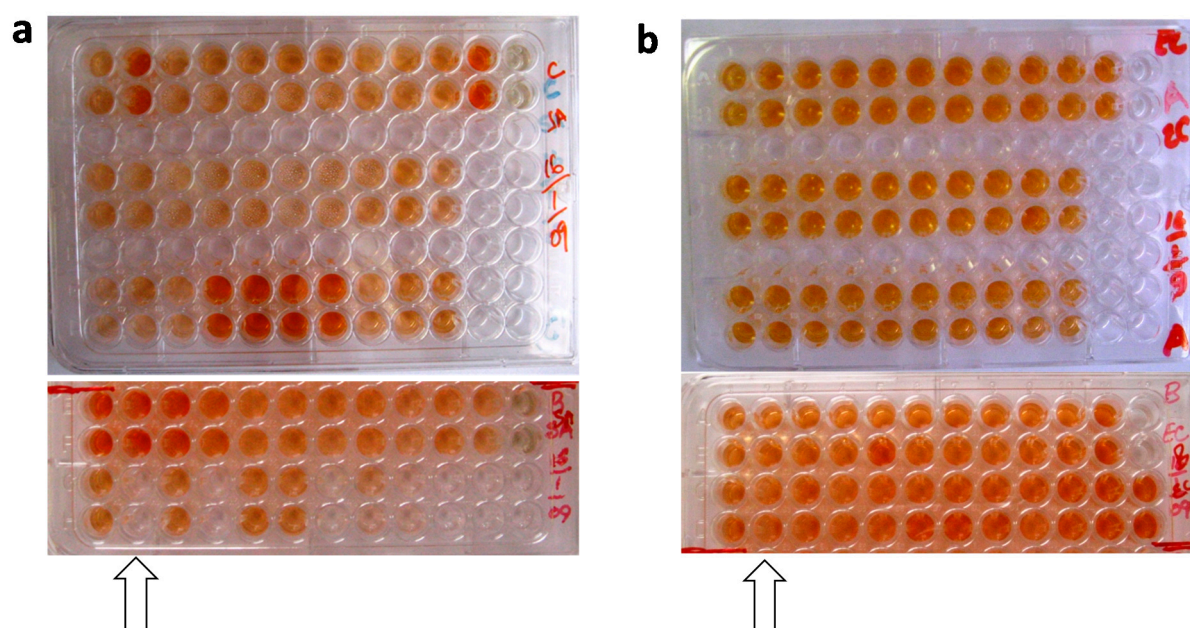

**Figure S1.** XTT bioassays of fractions obtained after preparative separation of *n*-hexane extract of *D. viscosa* using generic gradient and volume-based fractionation against *S. aureus* (NCIMB 6571) (a) and *E. coli* (NCIMB 8797) (b). Fraction 42 (arrow) contained high purity, bioactive compound.

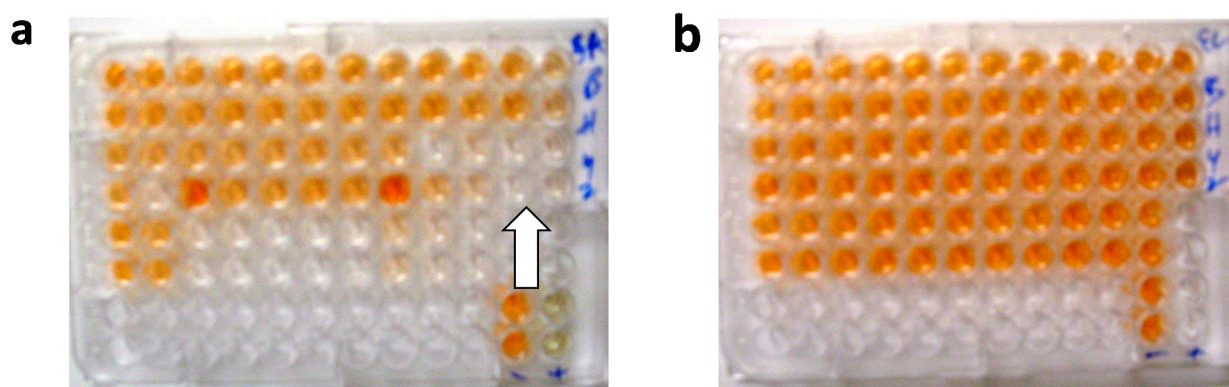

**Figure S2.** XTT bioassays of sub-fractions from bioactive fraction 42 from *n*-hexane extract of *D. viscosa* using polarity focused gradient against *S. aureus* (NCIMB 6571) (a) and *E. coli* (NCIMB 8797) (b). Sub-fraction 12 (arrow) contained high purity, bioactive compound.
